# Supplementary material
Source: PubMed Central journal article supplement (PMC2583081)

e8.5

**A**

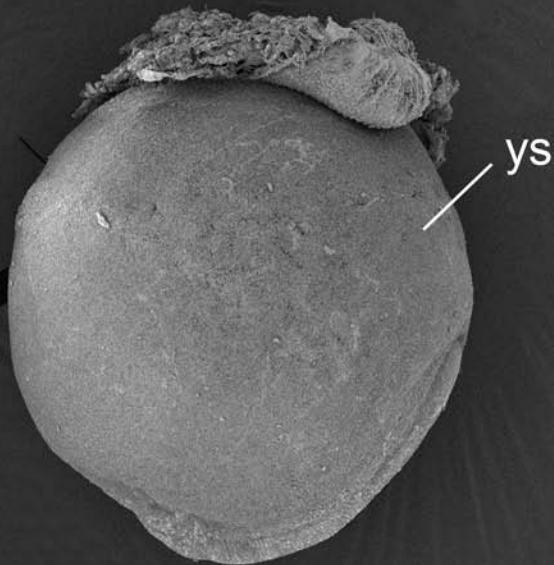

**B**

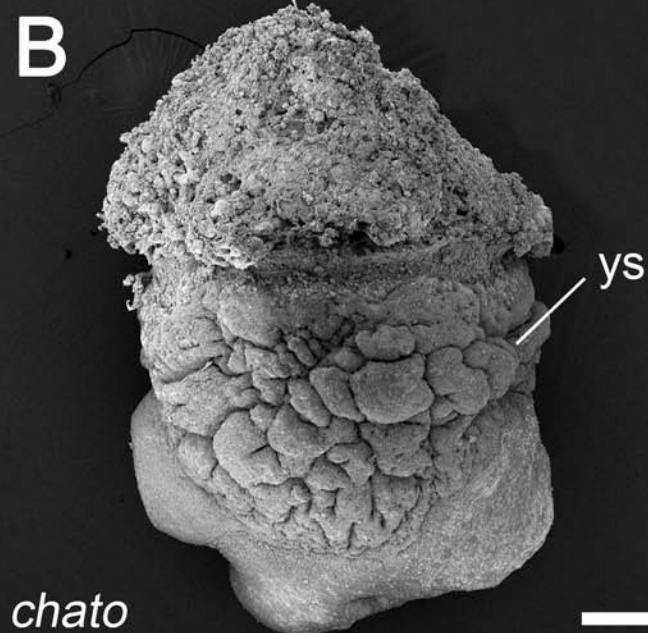

e7.5

**C**

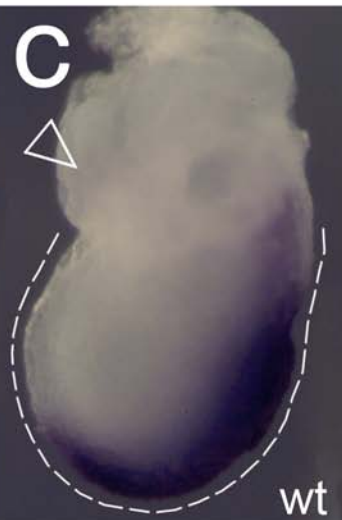

**D**

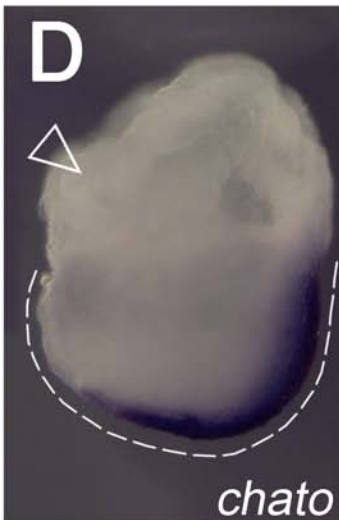

**E**

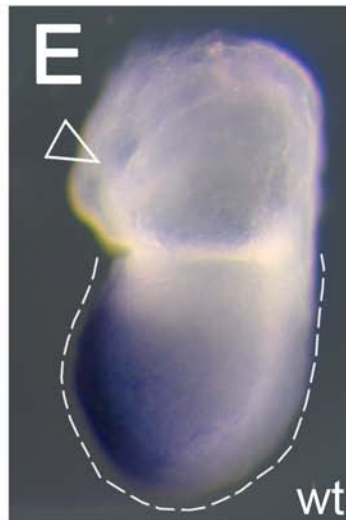

**F**

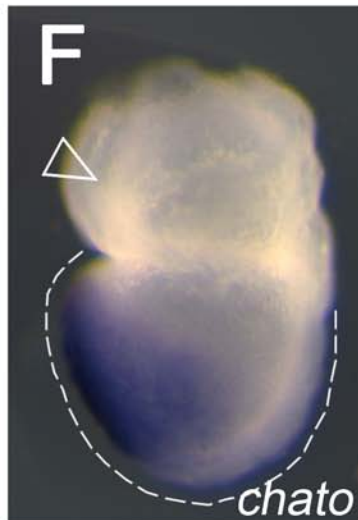

*Brachyury*

*Cer1*

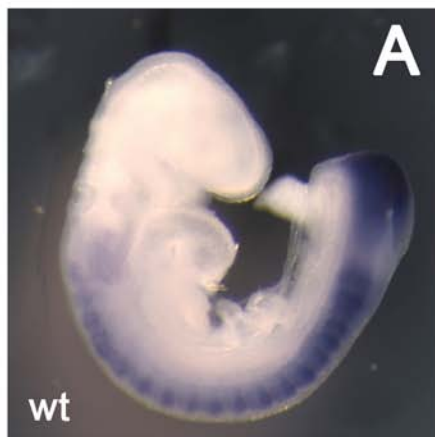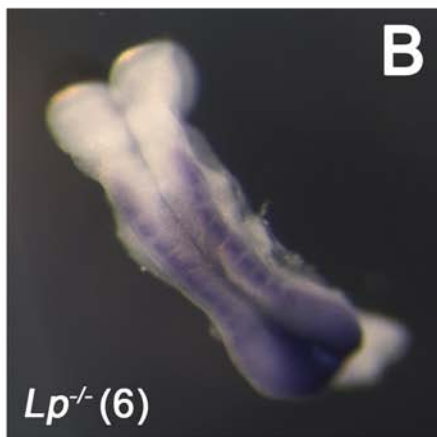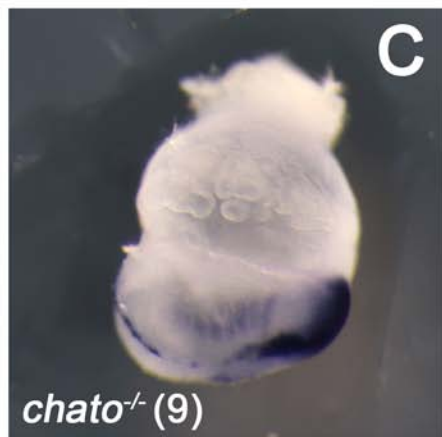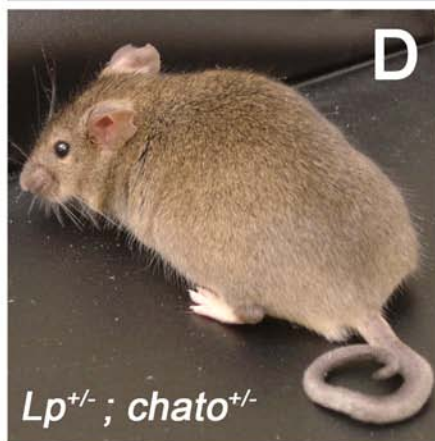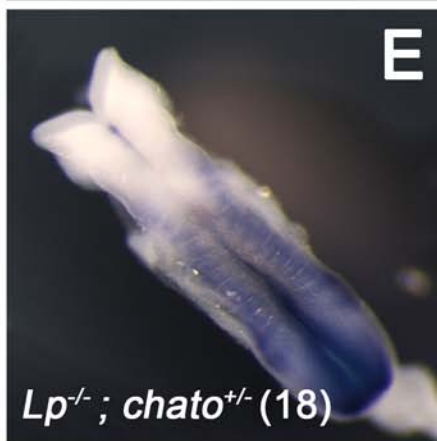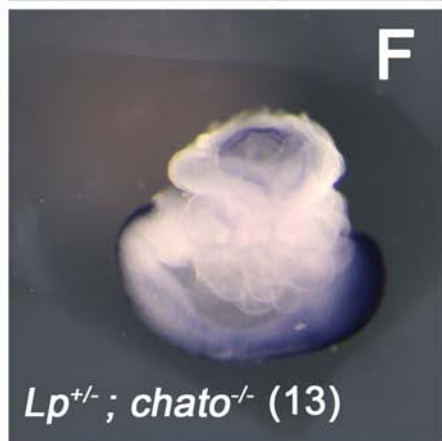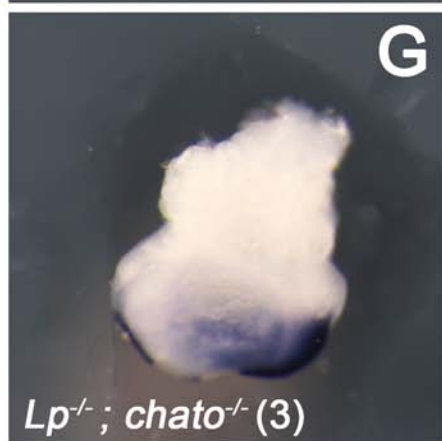

*Vangl2*

**A**

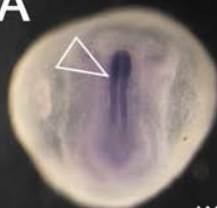

wt

**B**

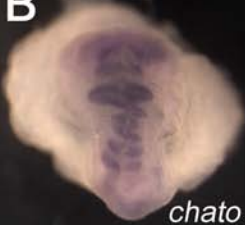

*chato*

*Celsr1*

**C**

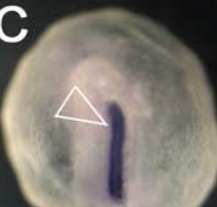

wt

**D**

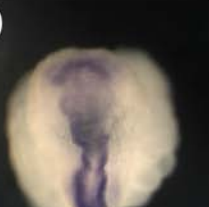

*chato*

*Fzd3*

**E**

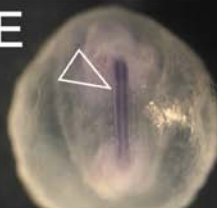

wt

**F**

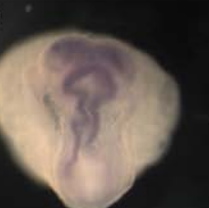

*chato*

*Dvl2*

**G**

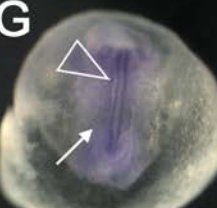

wt

**H**

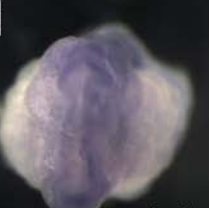

*chato*

*chato*

**I**

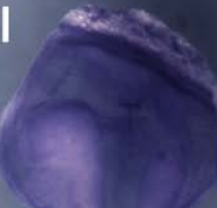

wt

**J**

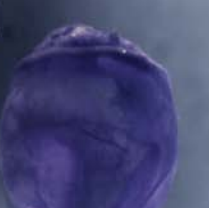

*Lp*

8 somites

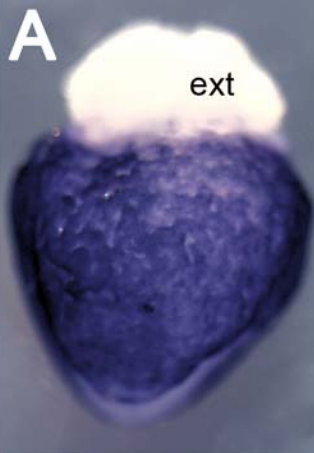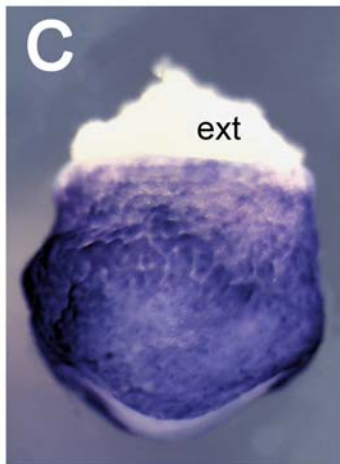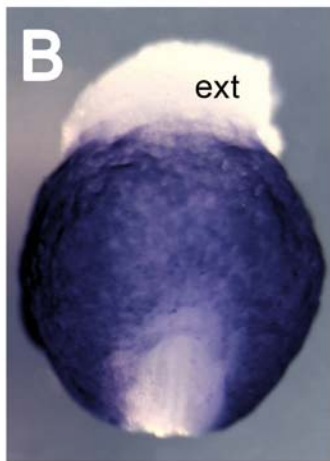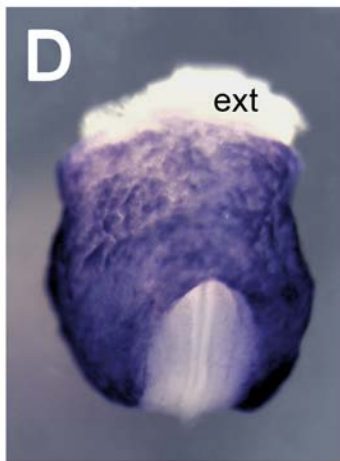

wt

*Lp*

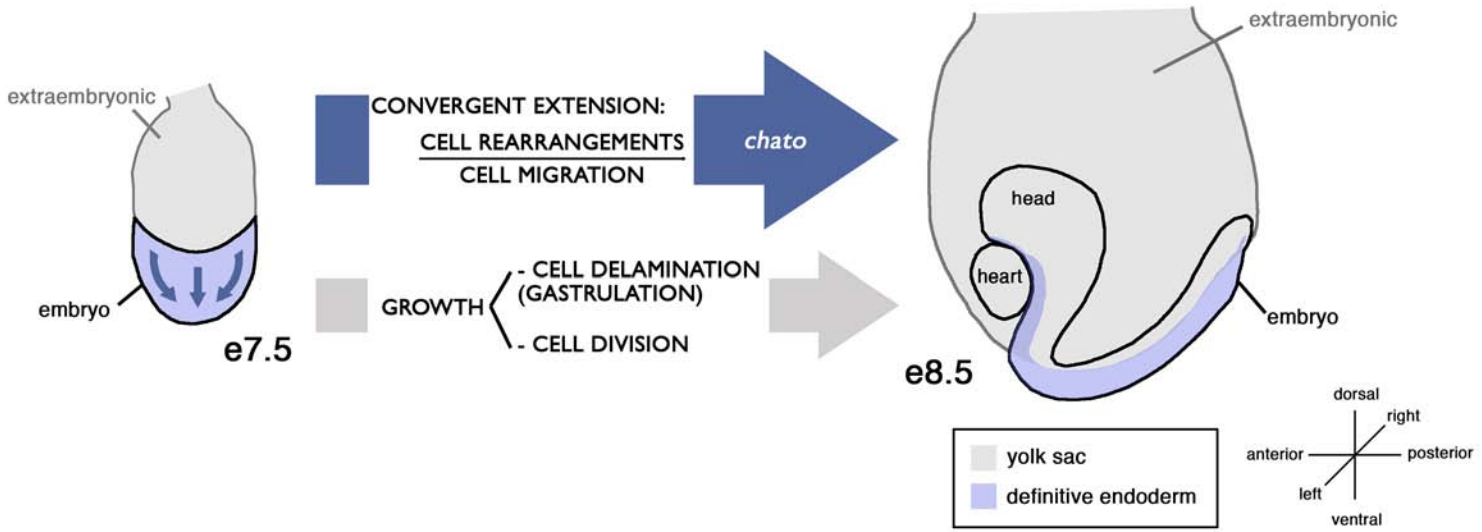

Supplement: NIHMS69107-supplement-Supplement.pdf [file NIHMS69107-supplement-Supplement.pdf]
